# Supplementary material for: A Retrospective Review of the Clinical Experience of Linezolid with or Without Rifampicin in Prosthetic Joint Infections Treated with Debridement and Implant Retention
Source: Springer Nature journal article supplement (doi:10.1007/s40121-014-0032-z), 2014-08-19
Supplement: MOESM1 [file 9339634]

- A retrospective observational study was performed in 3 hospitals from Barcelona, Tours and Lille between 2005 and 2011.
- All 39 patients included had an acute prosthetic joint infection (PJI), were treated with an open debridement with implant retention and received linezolid for more than 7 days.
- The results of this study suggest that this treatment had a high remission rate.
- The study suggests that linezolid could be an alternative treatment for infections due to fluoroquinolone and/or rifampicin resistant staphylococci.

This summary slide represents the opinions of the authors. Sponsorship for this study was funded by Pfizer (Madrid, Spain) and Fundación Privada Máximo Soriano Jiménez (Barcelona, Spain). For a full list of acknowledgments and conflicts of interest for all authors of this article, please see the full text online. Copyright © The Authors 2014. Creative Commons Attribution Noncommercial License (CC BY-NC).
